# Supplementary material for: Heavy Metal Contamination Alters the Co-Decomposition of Leaves of the Invasive Tree Rhus typhina L. and the Native Tree Koelreuteria paniculata Laxm
Source: MDPI journal article supplement (doi:10.3390/plants12132523), 2023-07-01
Supplement: s1 [file s1]

# Electronic supplementary materials:

**Table S1** Three-way ANOVA showing the effect of the main factors: the concentration of heavy metal contamination ( $C_{HM}$ ), the type of heavy metal contamination ( $T_{HM}$ ), and the type of the leaves ( $T_L$ ), and their interactions on the decomposition coefficient ( $k$ ), soil pH, soil enzymatic activities, and the alpha diversity of soil bacteria.  $P$  values equal to or less than 0.05 are shown in bold.

| Variable and source of variation |                                | Type III Sum<br>of Squares | $df$ | Mean<br>Square | $F$    | $P$              | Partial<br>$\eta^2$ |
|----------------------------------|--------------------------------|----------------------------|------|----------------|--------|------------------|---------------------|
| $C_{HM}$                         | $k$                            | <0.001                     | 2    | <0.001         | 1.638  | 0.207            | 0.072               |
|                                  | Soil pH                        | 0.060                      | 2    | 0.030          | 3.366  | <b>0.044</b>     | 0.138               |
|                                  | Soil peroxidase activity       | 4.071                      | 2    | 2.035          | 1.912  | 0.160            | 0.083               |
|                                  | Soil sucrase activity          | 0.257                      | 2    | 0.128          | 1.137  | 0.331            | 0.051               |
|                                  | Soil protease activity         | <0.001                     | 2    | <0.001         | 0.145  | 0.866            | 0.007               |
|                                  | Soil urease activity           | 17700.586                  | 2    | 8850.293       | 44.371 | <b>&lt;0.001</b> | 0.679               |
|                                  | Soil acid phosphatase activity | 0.055                      | 2    | 0.027          | 1.825  | 0.174            | 0.080               |
|                                  | Phylogenetic diversity index   | 5475.480                   | 2    | 2737.740       | 49.064 | <b>&lt;0.001</b> | 0.700               |
|                                  | Sobs index                     | 202195.593                 | 2    | 101097.796     | 47.239 | <b>&lt;0.001</b> | 0.692               |
|                                  | Shannon's diversity index      | 0.630                      | 2    | 0.315          | 19.319 | <b>&lt;0.001</b> | 0.479               |
|                                  | Simpson's dominance index      | <0.001                     | 2    | <0.001         | 1.992  | 0.149            | 0.087               |
|                                  | Pielou's evenness index        | 0.002                      | 2    | <0.001         | 8.414  | <b>&lt;0.001</b> | 0.286               |
|                                  | ACE's richness index           | 314944.593                 | 2    | 157472.297     | 44.948 | <b>&lt;0.001</b> | 0.682               |
|                                  | Chao1's richness index         | 213608.857                 | 2    | 106804.428     | 39.678 | <b>&lt;0.001</b> | 0.654               |

|                 |                                |            |   |            |         |                  |        |
|-----------------|--------------------------------|------------|---|------------|---------|------------------|--------|
| T <sub>HM</sub> | <i>k</i>                       | 0.013      | 1 | 0.013      | 49.988  | <b>&lt;0.001</b> | 0.543  |
|                 | Soil pH                        | 0.491      | 1 | 0.491      | 54.766  | <b>&lt;0.001</b> | 0.566  |
|                 | Soil peroxidase activity       | 3.736      | 1 | 3.736      | 3.509   | 0.068            | 0.077  |
|                 | Soil sucrase activity          | 0.533      | 1 | 0.533      | 4.726   | <b>0.035</b>     | 0.101  |
|                 | Soil protease activity         | 0.011      | 1 | 0.011      | 6.552   | <b>0.014</b>     | 0.135  |
|                 | Soil urease activity           | 25563.616  | 1 | 25563.616  | 128.164 | <b>&lt;0.001</b> | 0.753  |
|                 | Soil acid phosphatase activity | <0.001     | 1 | <0.001     | 0.041   | 0.841            | <0.001 |
|                 | Phylogenetic diversity index   | 6058.249   | 1 | 6058.249   | 108.572 | <b>&lt;0.001</b> | 0.721  |
|                 | Sobs index                     | 113804.463 | 1 | 113804.463 | 53.176  | <b>&lt;0.001</b> | 0.559  |
|                 | Shannon's diversity index      | 0.006      | 1 | 0.006      | 0.358   | 0.553            | 0.008  |
|                 | Simpson's dominance index      | <0.001     | 1 | <0.001     | 25.187  | <b>&lt;0.001</b> | 0.375  |
|                 | Pielou's evenness index        | 0.001      | 1 | 0.001      | 12.034  | <b>0.001</b>     | 0.223  |
|                 | ACE's richness index           | 143587.001 | 1 | 143587.001 | 40.985  | <b>&lt;0.001</b> | 0.494  |
|                 | Chao1's richness index         | 64238.603  | 1 | 64238.603  | 23.865  | <b>&lt;0.001</b> | 0.362  |
| T <sub>L</sub>  | <i>k</i>                       | 0.032      | 2 | 0.016      | 63.420  | <b>&lt;0.001</b> | 0.751  |
|                 | Soil pH                        | 0.086      | 2 | 0.043      | 4.798   | <b>0.013</b>     | 0.186  |
|                 | Soil peroxidase activity       | 4.153      | 2 | 2.076      | 1.950   | 0.155            | 0.085  |
|                 | Soil sucrase activity          | 0.696      | 2 | 0.348      | 3.084   | 0.056            | 0.128  |
|                 | Soil protease activity         | 0.003      | 2 | 0.001      | 0.902   | 0.413            | 0.041  |
|                 | Soil urease activity           | 552.620    | 2 | 276.310    | 1.385   | 0.261            | 0.062  |
|                 | Soil acid phosphatase activity | 0.038      | 2 | 0.019      | 1.257   | 0.295            | 0.056  |
|                 | Phylogenetic diversity index   | 198.190    | 2 | 99.095     | 1.776   | 0.182            | 0.078  |

|                   |                                |           |   |          |        |                  |       |
|-------------------|--------------------------------|-----------|---|----------|--------|------------------|-------|
|                   | Sobs index                     | 8616.289  | 2 | 4308.144 | 2.013  | 0.146            | 0.087 |
|                   | Shannon's diversity index      | 0.004     | 2 | 0.002    | 0.110  | 0.896            | 0.005 |
|                   | Simpson's dominance index      | <0.001    | 2 | <0.001   | 0.130  | 0.879            | 0.006 |
|                   | Pielou's evenness index        | <0.001    | 2 | <0.001   | 0.108  | 0.898            | 0.005 |
|                   | ACE's richness index           | 14272.340 | 2 | 7136.170 | 2.037  | 0.143            | 0.088 |
|                   | Chao1's richness index         | 7334.123  | 2 | 3667.062 | 1.362  | 0.267            | 0.061 |
| $C_{HM} * T_{HM}$ | $k$                            | <0.001    | 2 | <0.001   | 1.640  | 0.206            | 0.072 |
|                   | Soil pH                        | 0.471     | 2 | 0.236    | 26.286 | <b>&lt;0.001</b> | 0.556 |
|                   | Soil peroxidase activity       | 8.612     | 2 | 4.306    | 4.045  | <b>0.025</b>     | 0.162 |
|                   | Soil sucrase activity          | 0.112     | 2 | 0.056    | 0.497  | 0.612            | 0.023 |
|                   | Soil protease activity         | 0.016     | 2 | 0.008    | 4.970  | <b>0.012</b>     | 0.191 |
|                   | Soil urease activity           | 2099.021  | 2 | 1049.511 | 5.262  | <b>0.009</b>     | 0.200 |
|                   | Soil acid phosphatase activity | 0.194     | 2 | 0.097    | 6.456  | <b>0.004</b>     | 0.235 |
|                   | Phylogenetic diversity index   | 773.557   | 2 | 386.779  | 6.932  | <b>0.003</b>     | 0.248 |
|                   | Sobs index                     | 3498.926  | 2 | 1749.463 | 0.817  | 0.448            | 0.037 |
|                   | Shannon's diversity index      | 0.032     | 2 | 0.016    | 0.991  | 0.380            | 0.045 |
|                   | Simpson's dominance index      | <0.001    | 2 | <0.001   | 0.587  | 0.561            | 0.027 |
|                   | Pielou's evenness index        | <0.001    | 2 | <0.001   | 1.690  | 0.197            | 0.074 |
|                   | ACE's richness index           | 2345.226  | 2 | 1172.613 | 0.335  | 0.717            | 0.016 |
|                   | Chao1's richness index         | 528.457   | 2 | 264.228  | 0.098  | 0.907            | 0.005 |
| $C_{HM} * T_L$    | $k$                            | 0.004     | 4 | 0.001    | 4.383  | <b>0.005</b>     | 0.295 |
|                   | Soil pH                        | 0.022     | 4 | 0.005    | 0.609  | 0.658            | 0.055 |

|                |                                |           |   |          |       |                  |       |
|----------------|--------------------------------|-----------|---|----------|-------|------------------|-------|
|                | Soil peroxidase activity       | 4.355     | 4 | 1.089    | 1.023 | 0.407            | 0.089 |
|                | Soil sucrase activity          | 0.174     | 4 | 0.044    | 0.386 | 0.817            | 0.035 |
|                | Soil protease activity         | 0.019     | 4 | 0.005    | 2.918 | <b>0.032</b>     | 0.217 |
|                | Soil urease activity           | 4497.093  | 4 | 1124.273 | 5.637 | <b>0.001</b>     | 0.349 |
|                | Soil acid phosphatase activity | 0.307     | 4 | 0.077    | 5.109 | <b>0.002</b>     | 0.327 |
|                | Phylogenetic diversity index   | 50.035    | 4 | 12.509   | 0.224 | 0.923            | 0.021 |
|                | Sobs index                     | 3647.852  | 4 | 911.963  | 0.426 | 0.789            | 0.039 |
|                | Shannon's diversity index      | 0.053     | 4 | 0.013    | 0.819 | 0.520            | 0.072 |
|                | Simpson's dominance index      | <0.001    | 4 | <0.001   | 2.288 | 0.076            | 0.179 |
|                | Pielou's evenness index        | <0.001    | 4 | <0.001   | 1.159 | 0.342            | 0.099 |
|                | ACE's richness index           | 13230.072 | 4 | 3307.518 | 0.944 | 0.448            | 0.082 |
|                | Chao1's richness index         | 13404.763 | 4 | 3351.191 | 1.245 | 0.307            | 0.106 |
| $T_{HM} * T_L$ | $k$                            | <0.001    | 2 | <0.001   | 1.134 | 0.332            | 0.051 |
|                | Soil pH                        | 0.034     | 2 | 0.017    | 1.895 | 0.163            | 0.083 |
|                | Soil peroxidase activity       | 0.532     | 2 | 0.266    | 0.250 | 0.780            | 0.012 |
|                | Soil sucrase activity          | 0.161     | 2 | 0.080    | 0.712 | 0.497            | 0.033 |
|                | Soil protease activity         | 0.003     | 2 | 0.001    | 0.891 | 0.418            | 0.041 |
|                | Soil urease activity           | 3854.690  | 2 | 1927.345 | 9.663 | <b>&lt;0.001</b> | 0.315 |
|                | Soil acid phosphatase activity | 0.155     | 2 | 0.078    | 5.172 | <b>0.010</b>     | 0.198 |
|                | Phylogenetic diversity index   | 93.986    | 2 | 46.993   | 0.842 | 0.438            | 0.039 |
|                | Sobs index                     | 2224.926  | 2 | 1112.463 | 0.520 | 0.598            | 0.024 |
|                | Shannon's diversity index      | 0.079     | 2 | 0.040    | 2.428 | 0.101            | 0.104 |

|                   |                                |           |   |          |       |              |       |
|-------------------|--------------------------------|-----------|---|----------|-------|--------------|-------|
|                   | Simpson's dominance index      | <0.001    | 2 | <0.001   | 1.449 | 0.246        | 0.065 |
|                   | Pielou's evenness index        | <0.001    | 2 | <0.001   | 3.947 | <b>0.027</b> | 0.158 |
|                   | ACE's richness index           | 1541.679  | 2 | 770.840  | 0.220 | 0.803        | 0.010 |
|                   | Chao1's richness index         | 738.863   | 2 | 369.431  | 0.137 | 0.872        | 0.006 |
| $C_{HM} * T_{HM}$ | $k$                            | <0.001    | 4 | <0.001   | 0.166 | 0.955        | 0.016 |
| $* T_L$           | Soil pH                        | 0.016     | 4 | 0.004    | 0.454 | 0.769        | 0.041 |
|                   | Soil peroxidase activity       | 5.732     | 4 | 1.433    | 1.346 | 0.269        | 0.114 |
|                   | Soil sucrase activity          | 0.582     | 4 | 0.146    | 1.290 | 0.289        | 0.109 |
|                   | Soil protease activity         | 0.025     | 4 | 0.006    | 3.948 | <b>0.008</b> | 0.273 |
|                   | Soil urease activity           | 4156.099  | 4 | 1039.025 | 5.209 | <b>0.002</b> | 0.332 |
|                   | Soil acid phosphatase activity | 0.261     | 4 | 0.065    | 4.350 | <b>0.005</b> | 0.293 |
|                   | Phylogenetic diversity index   | 126.871   | 4 | 31.718   | 0.568 | 0.687        | 0.051 |
|                   | Sobs index                     | 11935.852 | 4 | 2983.963 | 1.394 | 0.252        | 0.117 |
|                   | Shannon's diversity index      | 0.138     | 4 | 0.035    | 2.117 | 0.096        | 0.168 |
|                   | Simpson's dominance index      | <0.001    | 4 | <0.001   | 4.923 | <b>0.002</b> | 0.319 |
|                   | Pielou's evenness index        | <0.001    | 4 | <0.001   | 2.330 | 0.072        | 0.182 |
|                   | ACE's richness index           | 6253.077  | 4 | 1563.269 | 0.446 | 0.775        | 0.041 |
|                   | Chao1's richness index         | 4154.215  | 4 | 1038.554 | 0.386 | 0.818        | 0.035 |

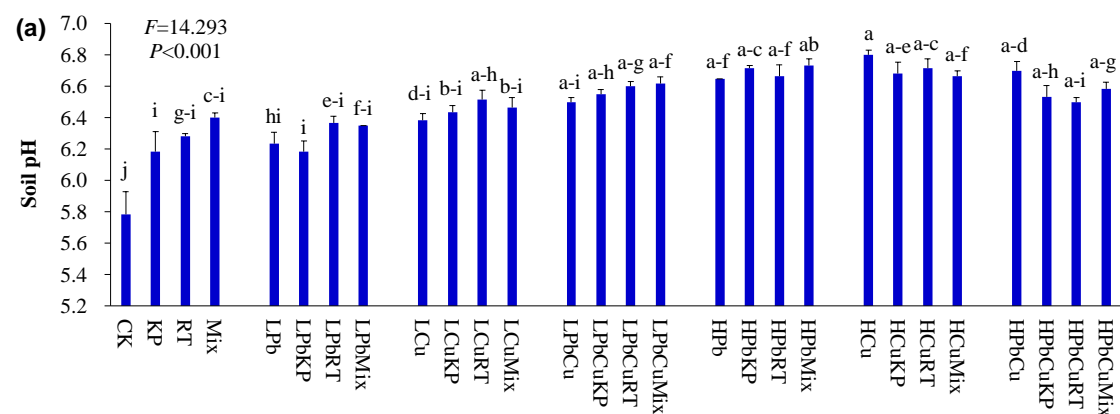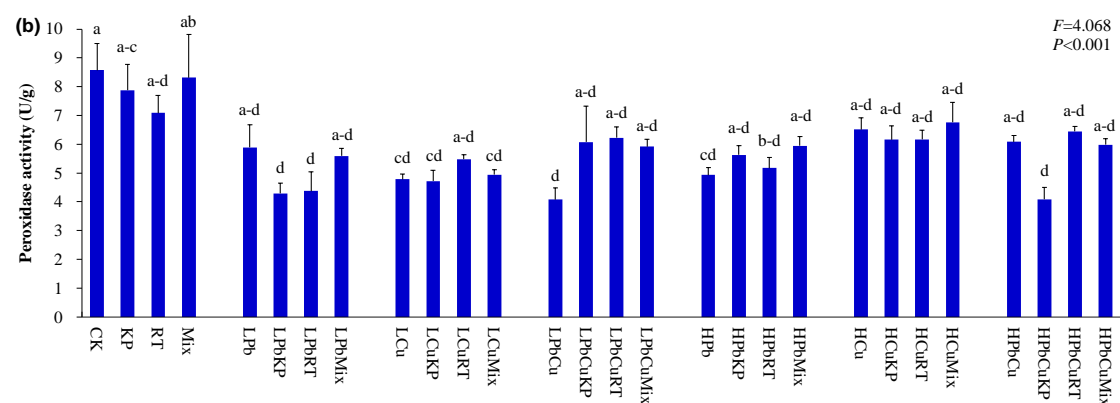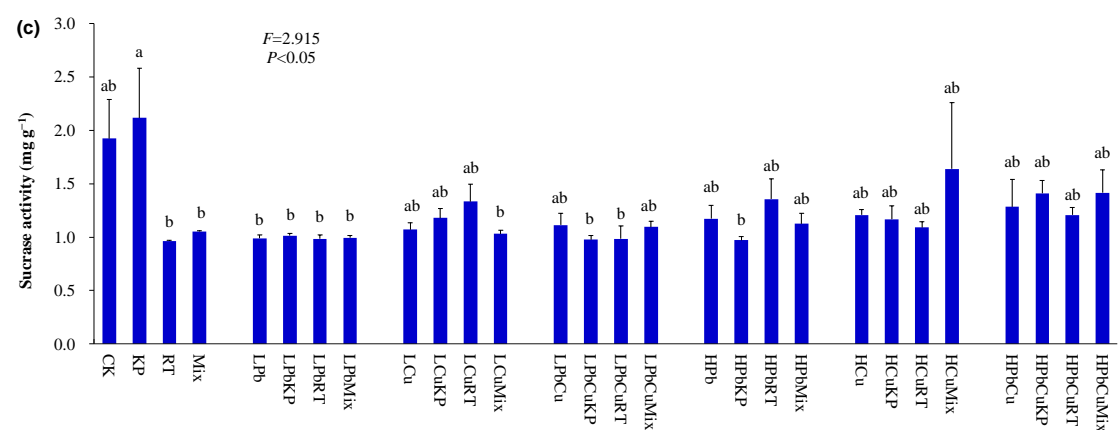

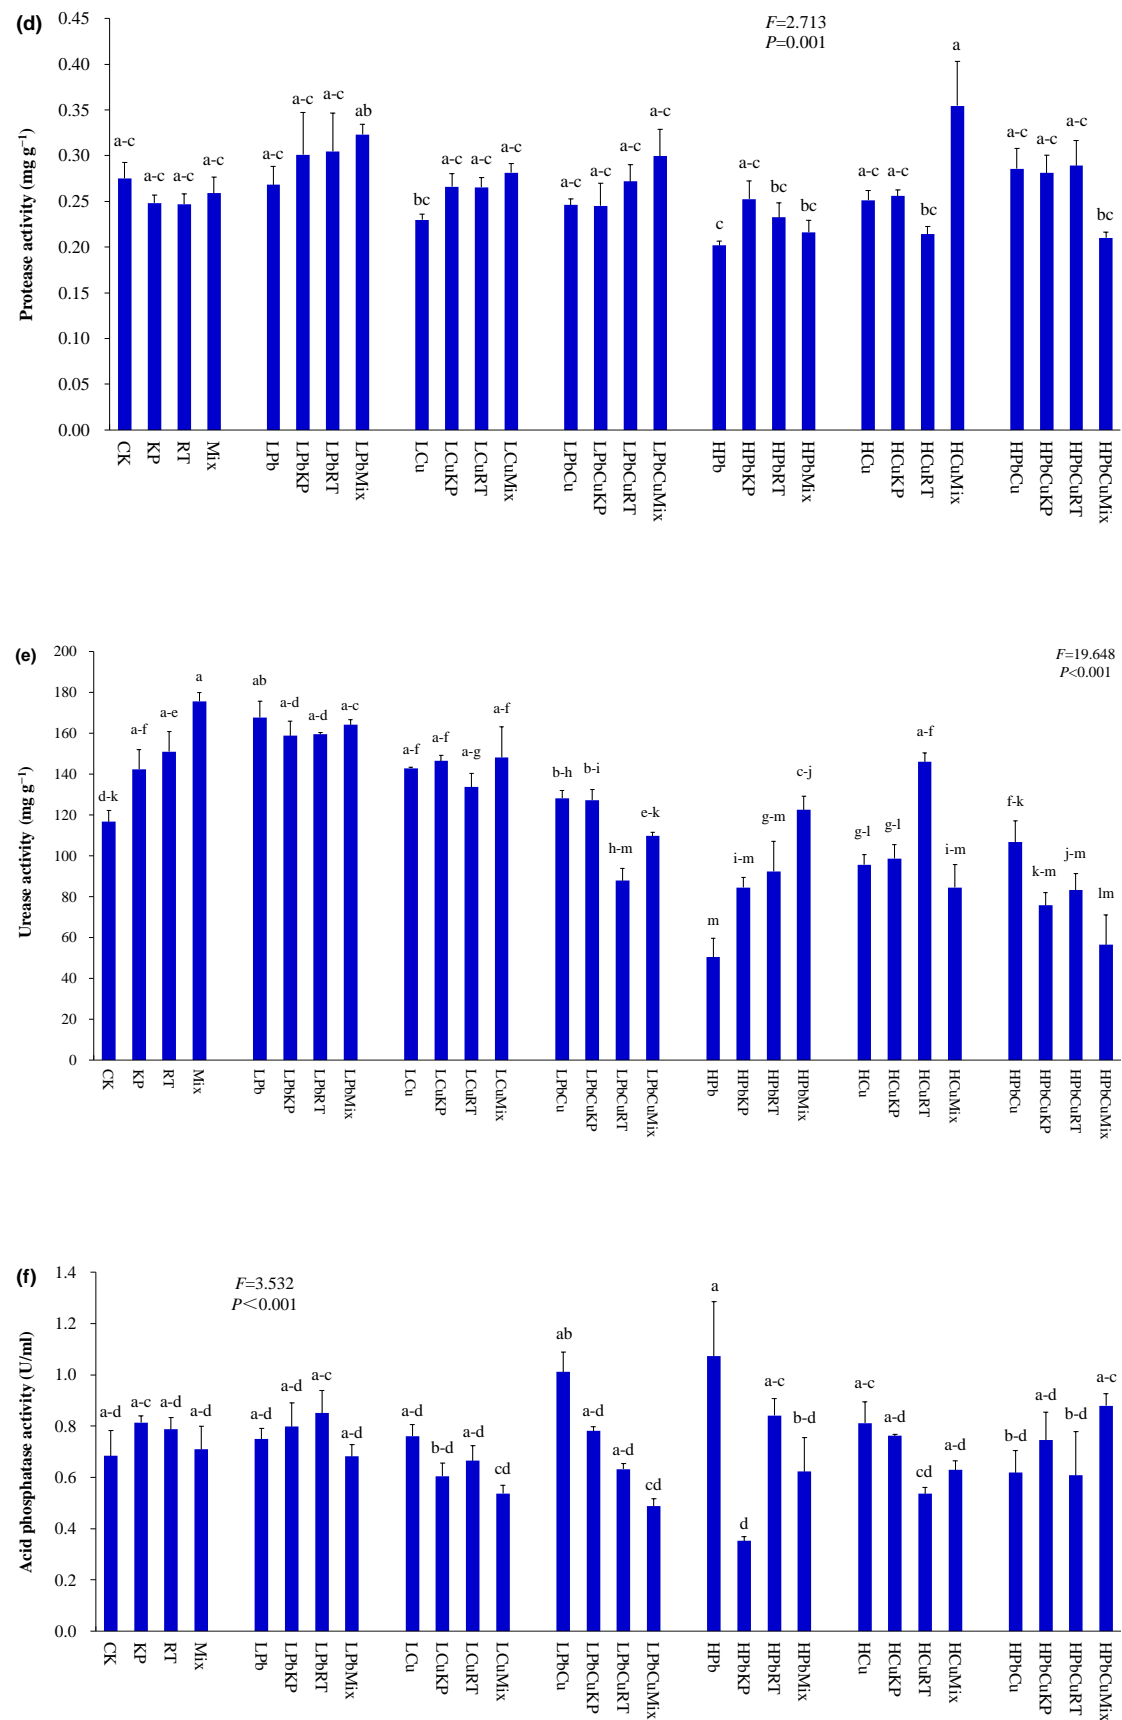

**Figure S1** Soil pH and soil enzymatic activities. Bars (means and SE;  $n = 3$ ) with

different letters mean statistically significant differences ( $P < 0.05$ ). Abbreviations: KP, *K. paniculata* leaves; RT, *R. typhina* leaves; Mix, the mixed leaves of the two trees; CK, control; LPb, a low concentration of independent Pb; LCu, a low concentration of independent Cu; LPbCu, a low concentration of combined Pb + Cu; HPb, a high concentration of independent Pb; HCu, a high concentration of independent Cu; HPbCu, a high concentration of combined Pb + Cu.



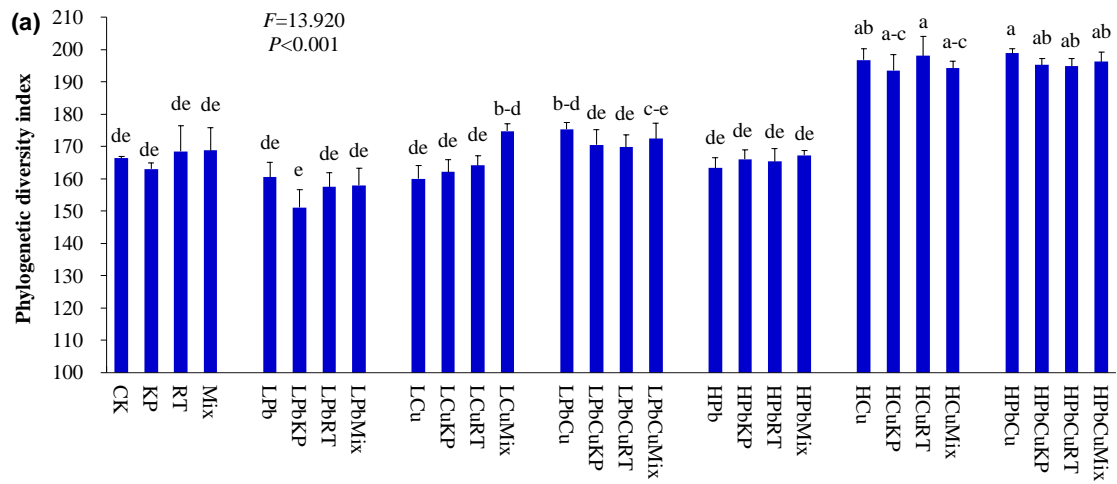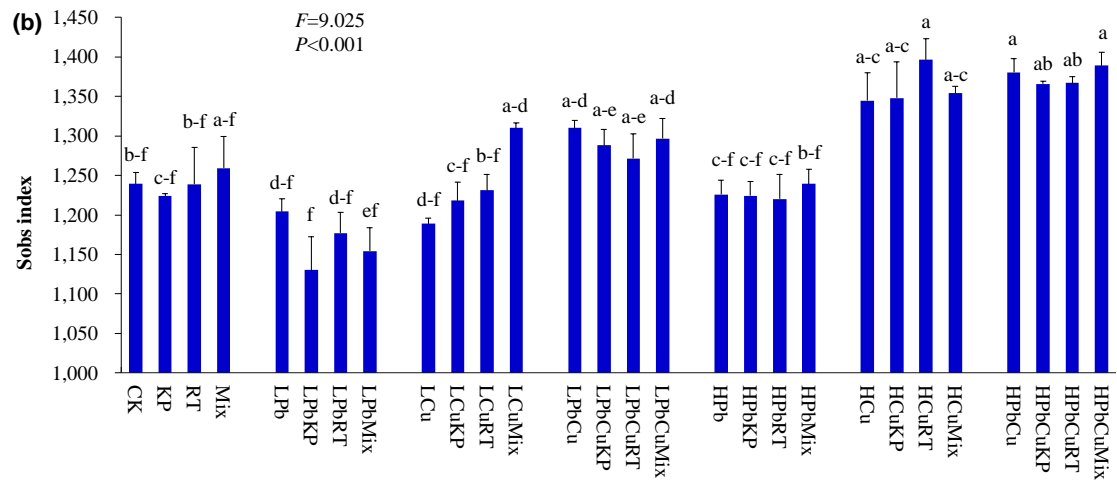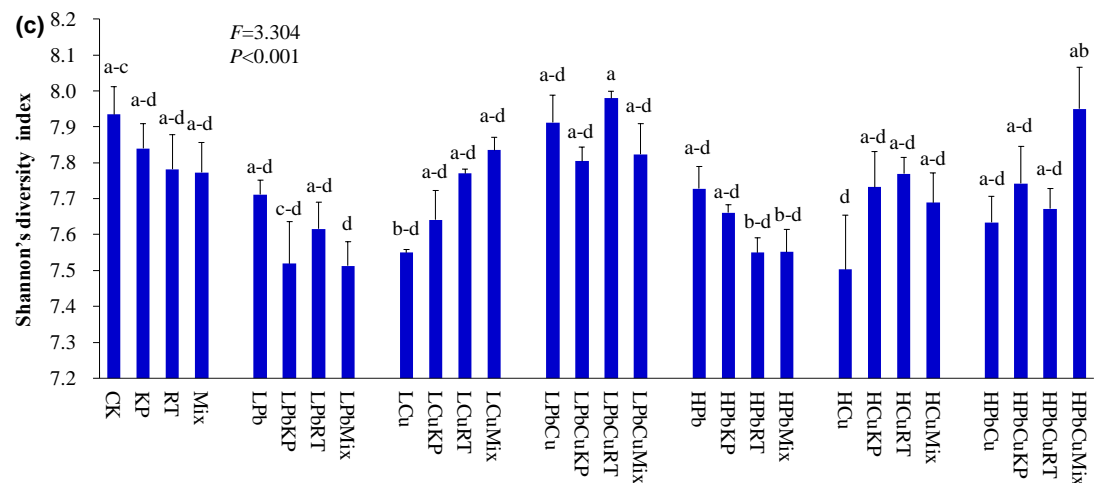

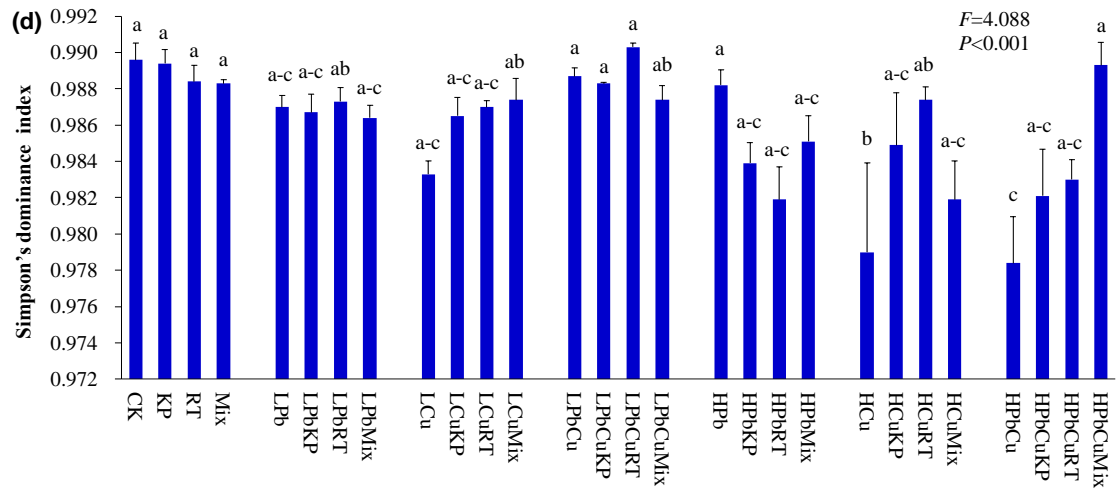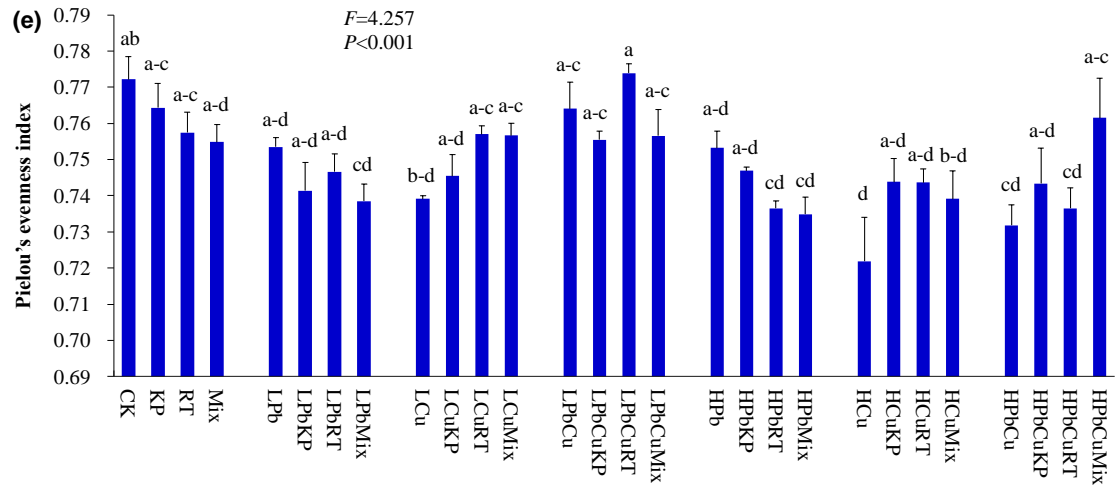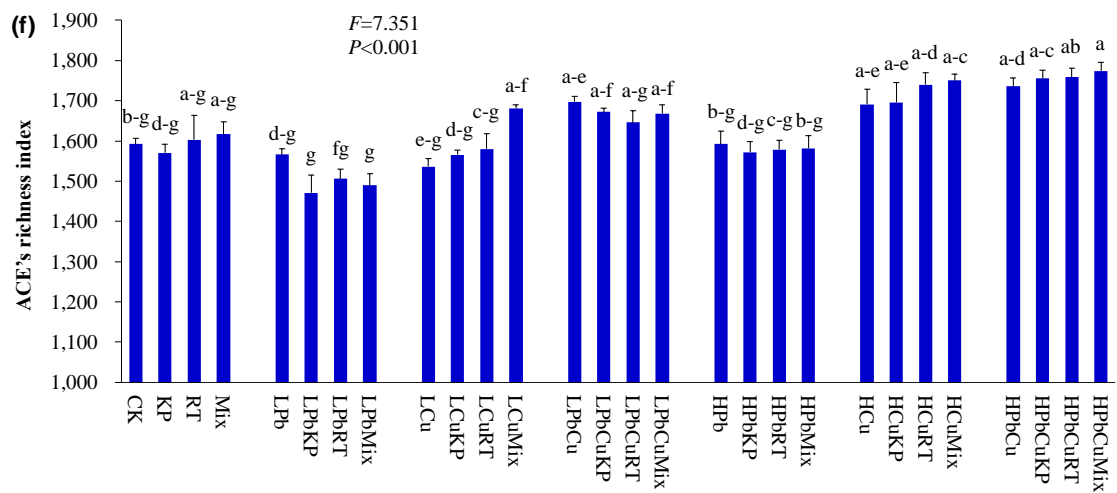

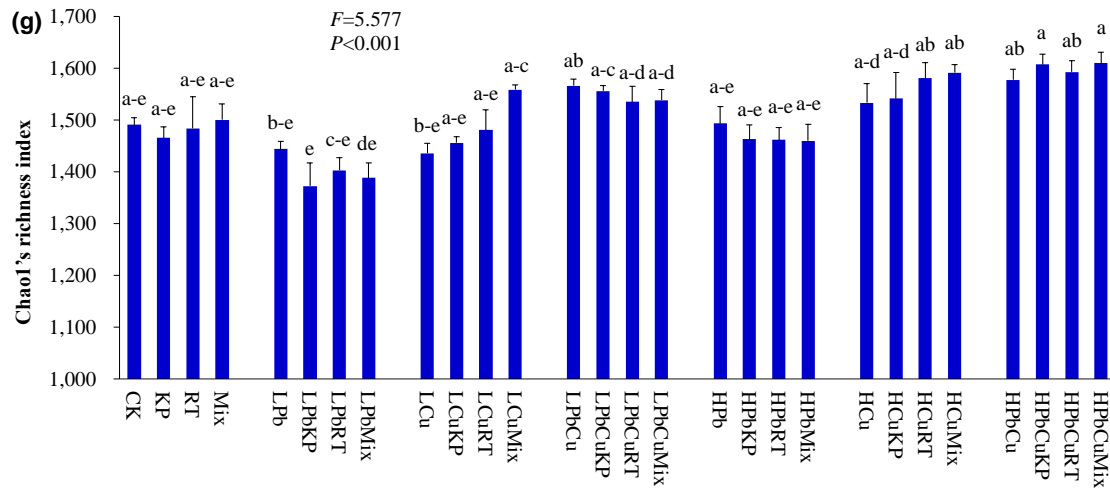

**Figure S2** Alpha diversity of soil bacteria. Bars (means and SE;  $n = 3$ ) with different letters mean statistically significant differences ( $P < 0.05$ ). Abbreviations have the same meanings as presented in Figure S1.



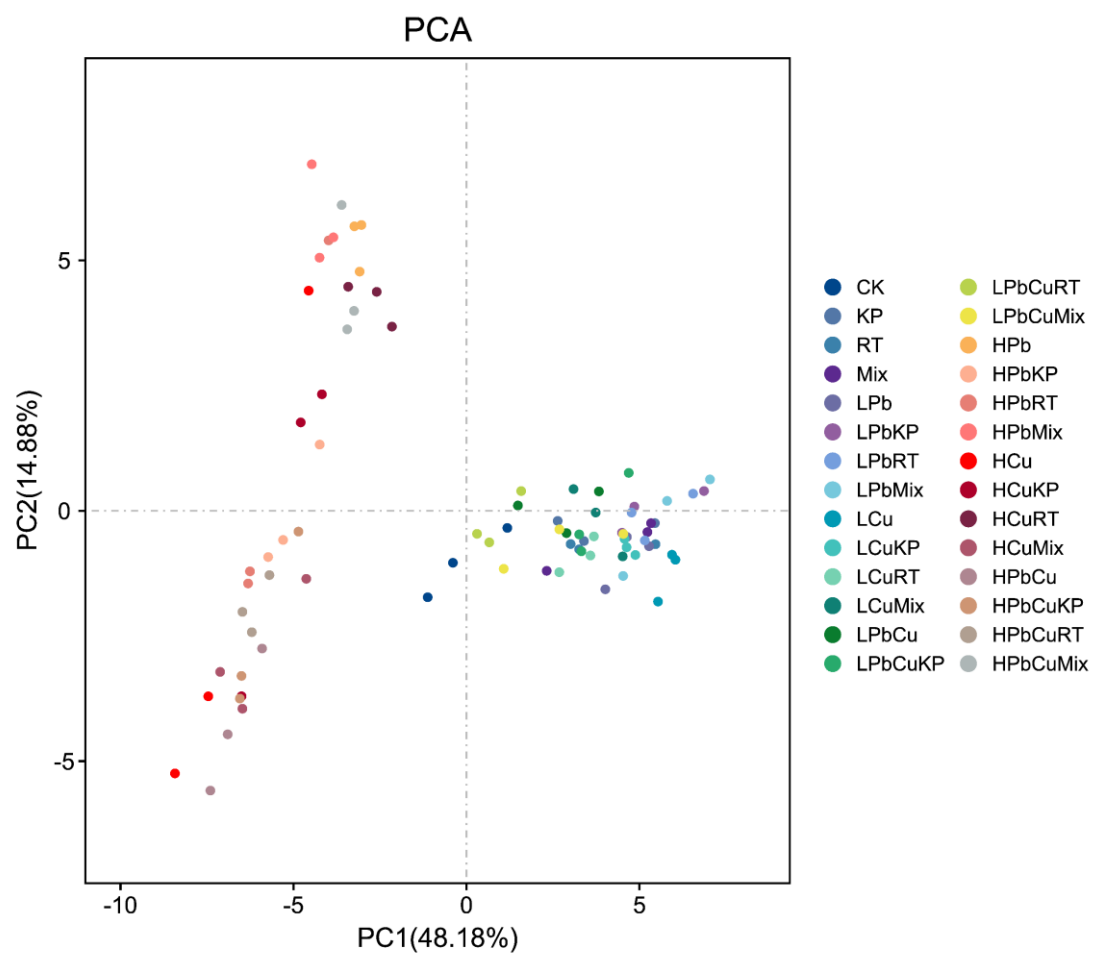

**Figure S4** PCA of soil bacteria based on weighted UniFrac distance. Abbreviations have the same meanings as presented in Figure S1.

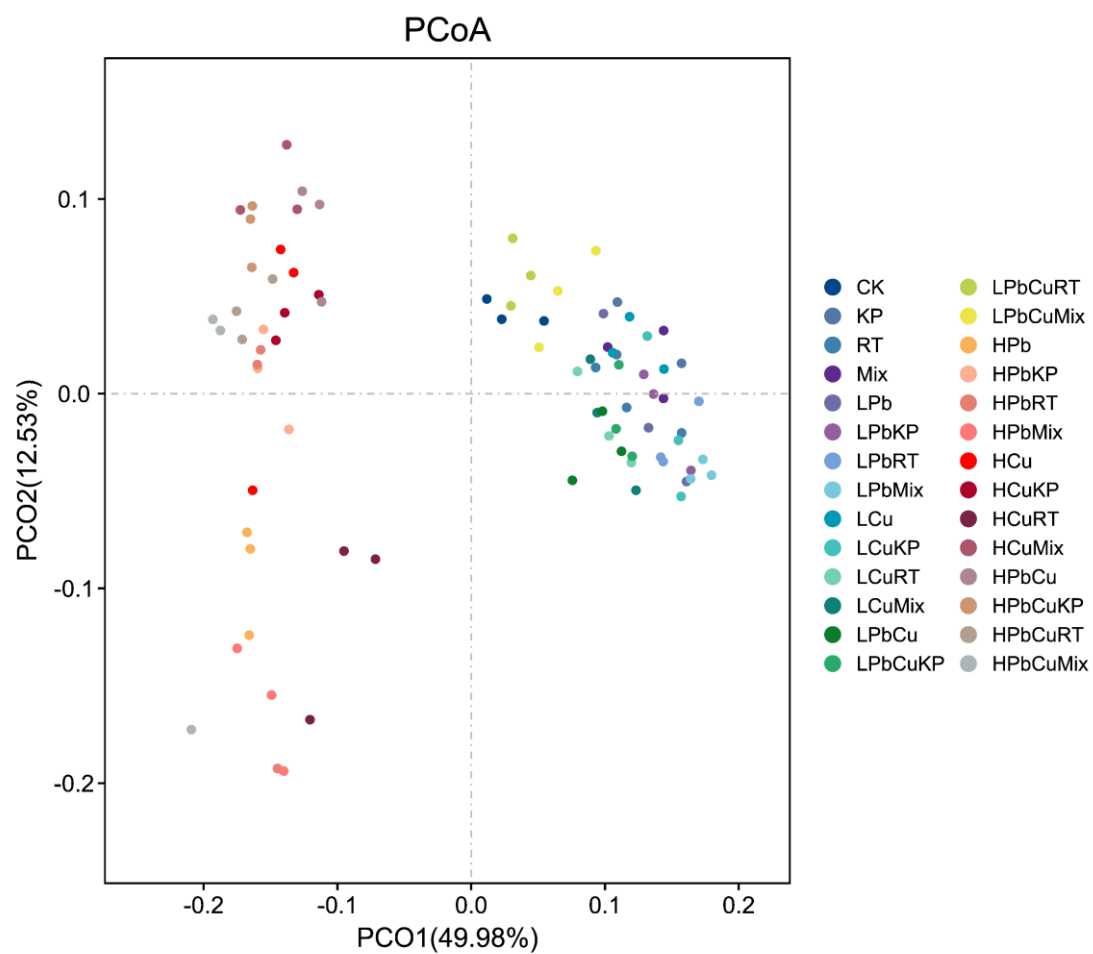

**Figure S5** PCoA of soil bacteria based on weighted UniFrac distance. Abbreviations have the same meanings as presented in Figure S1.

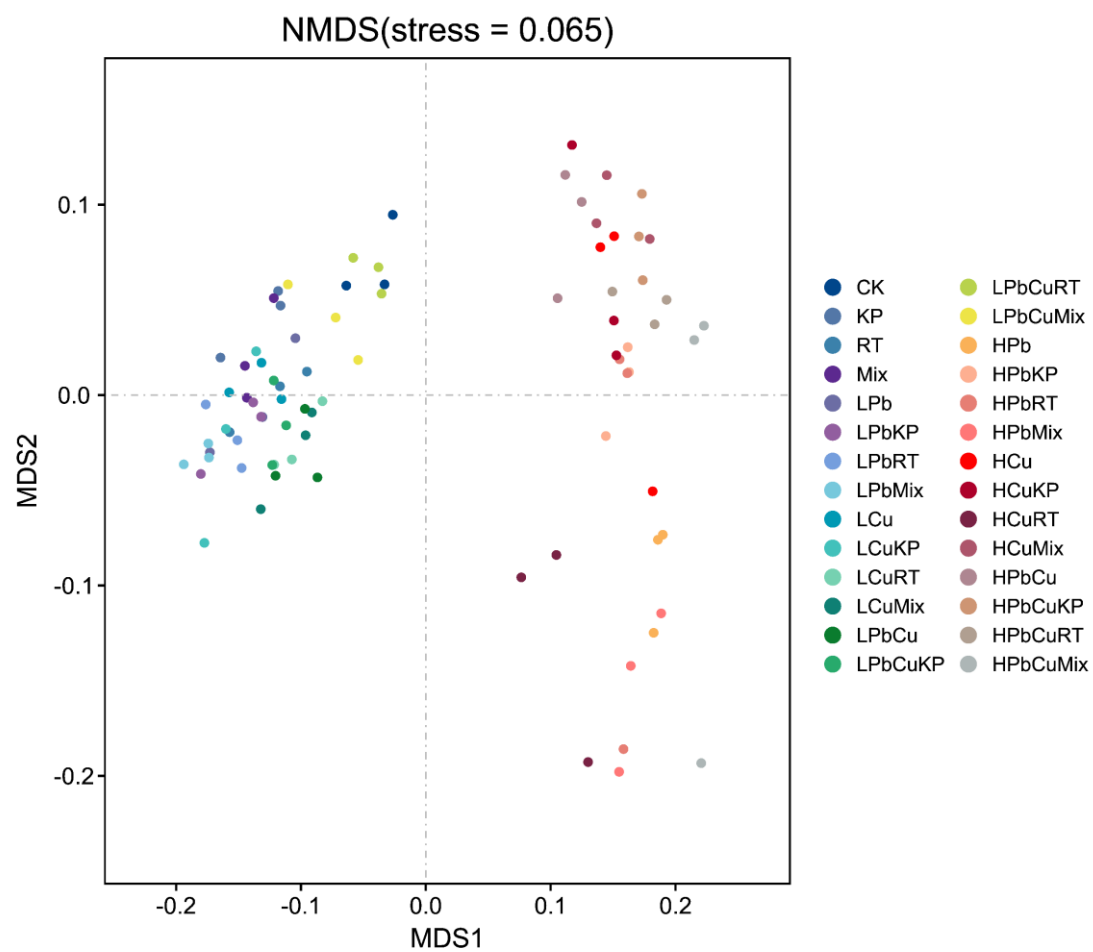

**Figure S6** NMDS of soil bacteria based on weighted UniFrac distance. Abbreviations have the same meanings as presented in Figure S1.
